# Supplementary material for: Evaluation of application of a novel disposable endoscope for retroflexed endoscopic rubber band ligation of internal hemorrhoids: A pilot study
Source: Research Square preprint supplement (doi:10.21203/rs.3.rs-3130331/v1), 2023-07-25
Supplement: Supplementary file 1 [file 86e3fd4a44db6244407d196d.docx]

**Supplementary Video Legends**

Supplementary Video 1. The procedure for endoscopic rubber band ligation for internal hemorrhoids using a disposable endoscope.

Supplementary Video 2. The procedure for endoscopic rubber band ligation for internal hemorrhoids using a reusable endoscope.
